# Supplementary material for: Synthesis and structure of tetrathiophene with a chiral 1,1′-binaphthyl kink
Source: Royal Society of Chemistry journal article supplement (doi:10.1039/b007355p), 2001-01-01

**Figure 1s.** Crystal packing for rac-**1**. Animated image with stepwise rotation along the approximate *c*-axis is shown. The enantiomers are color coded.


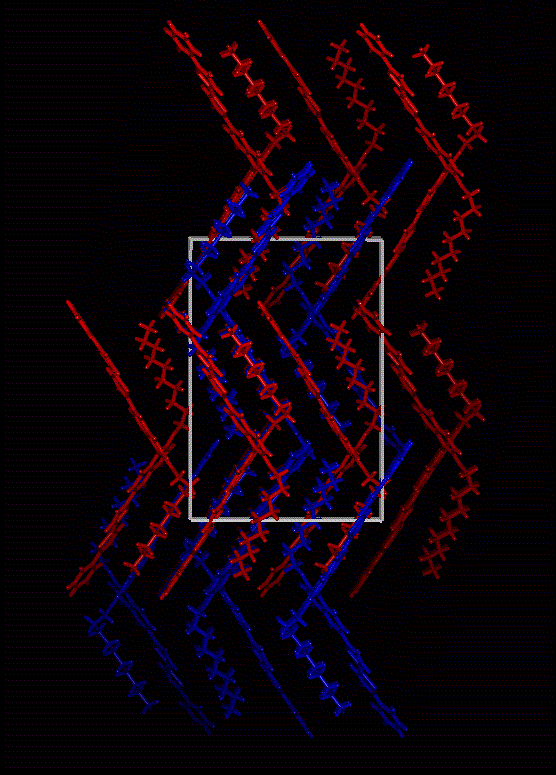


**Figure 2s.** Crystal packing for rac-**1**. Projection on the approximate *bc*-plane. The enantiomers are color coded: the red/cyan correspond to one enantiomer and orange/blue correspond to the other enantiomer.


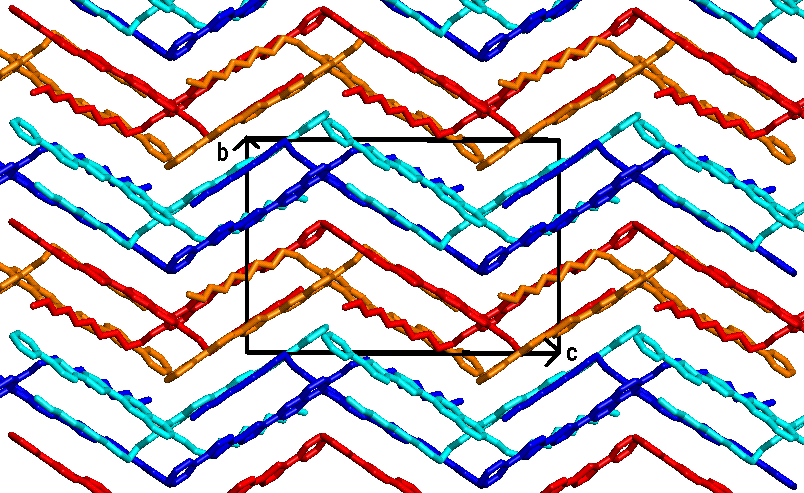

Supplement: b007355p2.doc [file b007355p2.doc]
